# Supplementary material
Source: PubMed Central journal article supplement (PMC2446652)
Supplement: supp_7_6_1071__1.pdf [file supp_7_6_1071__1.pdf]

**Contribution of the response regulators Ssk1p and Skn7p in the pseudohyphal development, stress adaptation and drug sensitivity in the opportunistic yeast *Candida lusitanae*.**

Gwenaël Ruprich-Robert, Florence Chapeland-Leclerc, Stéphanie Boisnard, Martine Florent, Gaël Bories, and Nicolas Papon\*

Programme Chimiorésistance des Levures Pathogènes, EA209 « Eucaryotes Pathogènes : Transports Membranaires et Chimiorésistance », UFR des Sciences Pharmaceutiques et Biologiques, Université Paris Descartes, 75006 Paris, France.

Running title : Role of Ssk1p and Skn7p response regulators in *Candida lusitanae*.

**SUPPLEMENTAL MATERIAL**

-----

\* Corresponding author. Mailing address: Programme Chimiorésistance des Levures Pathogènes, EA209 « Eucaryotes Pathogènes : Transports Membranaires et Chimiorésistance », UFR des Sciences Pharmaceutiques et Biologiques, Université Paris Descartes, 4 avenue de l'Observatoire, 75006 Paris, France. Phone: (+33) 1 53 73 96 42. Fax : (+33) 1 53 73 96 40. E-mail: nicolas.papon@univ-paris5.fr

1       **Strains and standard growth conditions.** *C. lusitanae* strains (**Table S2**) were  
 2 routinely cultivated in liquid YPD medium (1% yeast extract, 2% peptone, 2% glucose), at  
 3 35°C, under agitation (250 rpm). Solid media were prepared with 2% agar (Sigma).

4       **Sequence analysis.** The complete ORFs of *S. cerevisiae* ScYpd1p (Genbank accession  
 5 number SCU62016), ScSsk1p (Z73178) ScSkn7 (YSCSKN7) and *C. glabrata* CgYpd1p  
 6 (XM\_448442), CgSsk1p (XM\_445541) CgSkn7p (XM\_446363) were retrieved from the  
 7 NCBI database. Similarity searches in the yeast databases were performed with the BLAST  
 8 algorithm (2) using CaYpd1p (AF213247), CaSsk1p (AF084608) and CaSkn7p (AF510732)  
 9 of *C. albicans*. The complete open reading frames of the *C. lusitanae* *YPD1*, *SSK1* and *SKN7*  
 10 genes and corresponding homologues from *C. guillermondii* (CguiYpd1p: PGUG\_05889.1;  
 11 CguiSsk1p: PGUG\_01054.1; CguiSkn7p: PGUG\_02177.1) and *C. tropicalis* (CtYpd1p:  
 12 CTRG\_05488.3; CtSsk1p: CTRG\_03669.3; CtSkn7p: CTRG\_05246.3) were retrieved from  
 13 their respective genome databases available on the Broad Institute Fungal Genome web site  
 14 (<http://www.broad.mit.edu>).

15       **Plasmid constructions.** The backbone plasmids pG-*YPD1*, pG-*SSK1* and pG-*SKN7*  
 16 were built by cloning in pGEM-T easy vector (Promega) PCR amplification fragments  
 17 overlapping the *YPD1* (2555-bp), *SSK1* (5097-bp) and *SKN7* (4126-bp) genes, respectively.  
 18 All the primers used for PCR are listed in **Table S3** and were synthesized by Invitrogen.

19       To obtain plasmid pG- $\Delta$ *YPD1*/GUN, plasmid pG-*YPD1* was digested with AgeI  
 20 (producing compatible ends with XmaI) and XbaI to release a 602-bp central fragment from  
 21 the *YPD1* gene. The resulting digested plasmid was ligated to the GUN fragment (consisting  
 22 of the *C. lusitanae* *URA3* gene flanked on both sides by a non-coding 327-bp repeat named  
 23 REP) previously amplified from pGUN (6) with primers XMAUN1 and XBAUN2 (**Table**  
 24 **S3**) and digested with XmaI and XbaI. In the same way, plasmids pG- $\Delta$ *SSK1*/GUN and pG-  
 25  $\Delta$ *SKN7*/GUN were constructed from plasmids pG-*SSK1* and pG-*SKN7*, respectively,  
 26 replacing a BglII-digested central fragment from the *SSK1* and *SKN7* genes by a GUN  
 27 sequence amplified with primers BGLUN1 and BGLUN2 (**Table S3**). Thus, the three  
 28 resulting plasmids pG- $\Delta$ *YPD1*/GUN, pG- $\Delta$ *SSK1*/GUN and pG- $\Delta$ *SKN7*/GUN harbour 5' end-  
 29 *YPD1*-GUN-*YPD1*-3' end, 5' end-*SSK1*-GUN-*SSK1*-3' end and 5' end-*SKN7*-GUN-*SKN7*-  
 30 3' end disruption cassettes, respectively.

31       The complementation vectors were obtained by digestion of plasmids pG-*SSK1* and  
 32 pG-*SKN7* with NotI to release fragments overlapping *SSK1* and *SKN7* genes, respectively.  
 33 Finally, these fragments were subcloned into the unique NotI restriction site from plasmid  
 34 pVAX-*URA3* (6), resulting in complementation plasmids pVAX-*URA3*-*SSK1* and pVAX-  
 35 *URA3*-*SKN7*, respectively.

36       **Disruption of the *YPD1*, *SSK1* and *SKN7* genes in *C. lusitanae*.** The 5' end-*YPD1*-  
 37 GUN-*YPD1*-3' end, 5' end-*SSK1*-GUN-*SSK1*-3' end and 5' end-*SKN7*-GUN-*SKN7*-3' end  
 38 disruption cassettes (released by digestion with NotI from plasmids pG- $\Delta$ *YPD1*/GUN, pG-  
 39  $\Delta$ *SSK1*/GUN and pG- $\Delta$ *SKN7*/GUN, respectively) were separately used to transform the

40 strain 6936 *ura3*<sub>[Δ360]</sub> to prototrophy by the electroporation procedure, as previously  
 41 described (10). Correct insertion of the disrupting cassette was checked at each locus by  
 42 Southern analysis of the genomic DNA of a subset of 24 Ura<sup>+</sup> randomly selected  
 43 transformants. Genomic DNAs were digested with PstI or AgeI and membranes were  
 44 hybridized with YPD1, SSK1 or SKN7 digoxigenin-labelled DNA probes (PCR DIG probe  
 45 synthesis kit, Roche Molecular Biochemicals), according to the experiment. Hybridization  
 46 pattern revealed that homologous integration of the 5'end-*SSK1-GUN-SSK1*-3'end and  
 47 5'end-*SKN7-GUN-SKN7*-3'end cassettes at the corresponding target loci occurred in half of  
 48 transformants analyzed and was derived from gene replacement, resulting in the genotypes  
 49 *ura3*<sub>[Δ360]</sub>, *ssk1*Δ::*REP-URA3-REP* (abbreviated *ssk1*::*GUN*), and in *ura3*<sub>[Δ360]</sub>,  
 50 *skn7*Δ::*REP-URA3-REP* (abbreviated *skn7*::*GUN*), respectively (Fig. S2). For the  
 51 remaining Ura<sup>+</sup> transformants, the hybridization pattern revealed that they were derived from  
 52 gene replacement at the *ura3* locus (results not shown).

53 We failed to obtain homologous integration of the 5'end-*YPD1-GUN-YPD1*-3'end  
 54 cassette at the corresponding target locus. Southern blot analysis of 24 Ura<sup>+</sup> transformants  
 55 revealed that they only derived from ectopic integrations of the disruption cassette (50%) or  
 56 from gene replacement at the *ura3* locus (50%) (Fig. S3).

57 In order to obtain the double mutant genotype *ssk1*Δ *skn7*Δ, a representative  
 58 *skn7*::*GUN* Ura<sup>+</sup> transformant was plated onto YNB supplemented with 5FOA and uracil  
 59 and the genotype *ura3*<sub>[Δ360]</sub>, *skn7*Δ::*REP* (abbreviated *skn7*::*REP*) was assigned to the  
 60 5FOA-resistant clones (Fig. S2). The linear 5'end-*SSK1-GUN-SSK1*-3'end was used to  
 61 transform the strain *skn7*::*REP* and the double mutant genotype *ura3*<sub>[Δ360]</sub>, *skn7*Δ::*REP*,  
 62 *ssk1*Δ::*REP-URA3-REP* (abbreviated *skn7*::*REP ssk1*::*GUN*) was assigned to transformants  
 63 harbouring the expected hybridization profile as screened in the Fig. S2. The linear DNA  
 64 5'end-*SSK1-GUN-SSK1*-3'end and 5'end-*SKN7-GUN-SKN7*-3'end disruption cassettes were  
 65 also used to transform the strain PC1(α) (genotype *ura3*<sub>[Δ360]</sub> *MAT*α) (6) to prototrophy in  
 66 order to generate genotypes *MAT*α, *ura3*<sub>[Δ360]</sub>, *ssk1*Δ::*REP-URA3-REP* (abbreviated  
 67 *ssk1*::*GUN*α), and *MAT*α, *ura3*<sub>[Δ360]</sub>, *skn7*Δ::*REP-URA3-REP* (abbreviated *skn7*::*GUN*α),  
 68 respectively (Table S2)

69 **Complementation of the *ssk1* and *skn7* null mutant alleles.** To obtain reintegrant  
 70 strains, linearized plasmids pVAX-*URA3-SSK1* and pVAX-*URA3-SKN7* were used to  
 71 transform to prototrophy the *ssk1*::*REP* (counter-selected by cultivating *ssk1*::*GUN* strain  
 72 onto 5-FOA-containing YNB medium) and *skn7*::*REP* mutants, respectively. We verified by  
 73 Southern blot (Fig. S2) that homologous integration of the whole plasmids pVAX-*URA3-*  
 74 *SSK1* and pVAX-*URA3-SKN7* occurred at the *ssk1* and *skn7* loci, respectively, resulting to the  
 75 relevant genotypes *ura3*<sub>[Δ360]</sub>, *ssk1*Δ::*[REP, pVAX-URA3-SSK1]* (abbreviated *ssk1* + *SSK1*)  
 76 and *ura3*<sub>[Δ360]</sub>, *skn7*Δ::*[REP, pVAX-URA3-SKN7]* (abbreviated *skn7* + *SKN7*) (Table S2).

77 **Determination of generation time.** The generation time of each strain was  
78 determined in YPD and YNB liquid media following the protocol described in (5). Values  
79 reported in **Table S2** correspond to the average values of three independent experiments.

80 **Sensitivity test for stress responses, methylglyoxal (MG) and antifungal**  
81 **compounds.** Each strain was incubated overnight at 35°C in liquid YPD medium, washed,  
82 serially diluted ( $10^2$  to  $10^5$  dilutions) in distilled water, and spotted (4  $\mu$ l) onto solid YPD  
83 medium. This medium was supplemented with 1.5 M of NaCl, KCl or sorbitol (Sigma-  
84 Aldrich), with 1 to 8 mM H<sub>2</sub>O<sub>2</sub>, or with 25 mM MG (Sigma-Aldrich). Spotted cells were also  
85 exposed to UV for 12 s (2880 J/m<sup>2</sup>) using a UV table (Fischer Bioblock Scientific). For  
86 temperature sensitivity, YPD plates were incubated for 1 day at 43°C.

87 Stock solutions of fluconazole (FLC, ICN Biomedicals Inc.) and flucytosine (5FC,  
88 Sigma-Aldrich) were prepared by dissolving these antifungal agents in water at  
89 concentrations of 3.2 mg ml<sup>-1</sup> and 12.8 mg ml<sup>-1</sup>, respectively. Stock solution of amphotericin  
90 B (AmB, Bristol-Myers Squibb) (1.6 mg ml<sup>-1</sup>) was prepared in dimethylsulfoxide, as  
91 iprodione (100 mg ml<sup>-1</sup>) and fencpiclonil (100 mg ml<sup>-1</sup>), kindly provided by P. Leroux (INRA,  
92 Versailles, France). For FLC (0.25 to 16  $\mu$ g ml<sup>-1</sup>) and 5FC (0.25 to 16  $\mu$ g ml<sup>-1</sup>) antifungal  
93 susceptibility testing, we used RPMI 1640 AutoMod (modified for autoclaving) agar plates.  
94 For AmB susceptibility testing (0.25 to 16  $\mu$ g ml<sup>-1</sup>), we used the antibiotic medium 3 (Difco  
95 Laboratories) supplemented with 2% agar whereas YPD agar plates were employed to test  
96 iprodione (1 to 50  $\mu$ g ml<sup>-1</sup>) and fencpiclonil (1 to 50  $\mu$ g ml<sup>-1</sup>) susceptibility.

97 **Mating test.** Genetic crosses were performed under the same conditions as described  
98 previously (11, 23). The reference mating-type tester strains were 6936 *MATa* and C138  
99 *MAT $\alpha$*  strain. The number of conjugation tubes and produced tetrades (echinulate  
100 ascospores) was evaluated on three representative replicates for each unilateral (*ssk1::GUN*  
101 *MATa* X C138 *MAT $\alpha$*  and *skn7::GUN MATa* X C138 *MAT $\alpha$* ) and bilateral (*ssk1::GUN MATa*  
102 X *ssk1::GUN MAT $\alpha$*  and *skn7::GUN MATa* X *skn7::GUN MAT $\alpha$* ) genetic cross (11, 23).

103 **Pseudohyphal growth study and morphological observations.** The pseudohyphal  
104 growth was triggered spotting a 5- $\mu$ l drop ( $10^6$  cells) on YCB solid medium [1,17% Yeast  
105 Carbon Base (Difco laboratories)] supplemented with sorbitol (0.5 to 1.5 M), NaCl (0.3 to 1  
106 M), KCl (0.3 to 1 M), or H<sub>2</sub>O<sub>2</sub> (0.5 to 5 mM).

107 Pseudohyphae length was measured from the edge of the spotted colony after 48 h of  
108 growth with an inverted Leitz microscope fitted with a micrometer eye-piece. All pictures  
109 were taken with Olympus BX41 microscope using DP-controller software. Pictures of spotted  
110 cells producing pseudohyphae were taken directly on agar plates at 100X magnification.

TABLE S1. Characterization of genes potentially encoding HPt and RRs and deduced proteins in *C. lusitanae*

| Gene        | Acc. number <sup>a</sup> | Supercontig: position | Protein length (aa) | Identity (%) <sup>b</sup> |    |    |    |      |
|-------------|--------------------------|-----------------------|---------------------|---------------------------|----|----|----|------|
|             |                          |                       |                     | Sc                        | Cg | Ca | Ct | Cgui |
| <i>YPD1</i> | EU401919                 | 7 : 400231-400674     | 148                 | 35                        | 39 | 52 | 65 | 68   |
| <i>SSK1</i> | EU401920                 | 8 : 172732-174573     | 613                 | 21                        | 17 | 41 | 37 | 44   |
| <i>SKN7</i> | EU401921                 | 4 : 466961-468397     | 478                 | 41                        | 40 | 49 | 52 | 54   |

<sup>a</sup> These sequence have been submitted to the GenBank database

<sup>b</sup> Abbreviations : Sc, *S. cerevisiae*; Cg, *C. glabrata*; Ca, *C. albicans*; Ct, *C. tropicalis*; Cgui, *C. guilliermondii*

TABLE S2. *Candida lusitanae* strains

| Strain                             | Genotype                                                                       | Mating type | Generation time (h) <sup>d</sup> |            |
|------------------------------------|--------------------------------------------------------------------------------|-------------|----------------------------------|------------|
|                                    |                                                                                |             | YPD                              | YNB        |
| 6936 <sup>a</sup>                  | wild type                                                                      | <i>MATa</i> | 1.28 ±0.02                       | 1.50 ±0.05 |
| 6936 <i>ura3</i> <sub>[Δ360]</sub> | <i>ura3</i> <sub>[Δ360]</sub>                                                  | <i>MATa</i> | ND                               | ND         |
| PC1 (α) <sup>b</sup>               | <i>ura3</i> <sub>[Δ360]</sub>                                                  | <i>MATα</i> | ND                               | ND         |
| <i>ssk1::GUN</i> <sup>c</sup>      | <i>ura3</i> <sub>[Δ360]</sub> , <i>ssk1Δ::REP-URA3-REP</i>                     | <i>MATa</i> | 1.75 ±0.03                       | 1.67 ±0.05 |
| <i>skn7::GUN</i>                   | <i>ura3</i> <sub>[Δ360]</sub> , <i>skn71Δ::REP-URA3-REP</i>                    | <i>MATa</i> | 1.29 ±0.05                       | 1.53 ±0.07 |
| <i>ssk1::GUNα</i>                  | <i>ura3</i> <sub>[Δ360]</sub> , <i>ssk1Δ::REP-URA3-REP</i>                     | <i>MATα</i> | ND                               | ND         |
| <i>skn7::GUNα</i>                  | <i>ura3</i> <sub>[Δ360]</sub> , <i>skn7Δ::REP-URA3-REP</i>                     | <i>MATα</i> | ND                               | ND         |
| <i>ssk1::REP</i>                   | <i>ura3</i> <sub>[Δ360]</sub> , <i>ssk1Δ::REP</i>                              | <i>MATa</i> | ND                               | ND         |
| <i>skn7::REP</i>                   | <i>ura3</i> <sub>[Δ360]</sub> , <i>skn7Δ::REP</i>                              | <i>MATa</i> | ND                               | ND         |
| <i>skn7::REP ssk1::GUN</i>         | <i>ura3</i> <sub>[Δ360]</sub> , <i>skn7Δ::REP</i> , <i>ssk1Δ::REP-URA3-REP</i> | <i>MATa</i> | 1.76 ±0.15                       | 1.75 ±0.12 |
| <i>ssk1+ SSK1</i>                  | <i>ura3</i> <sub>[Δ360]</sub> , <i>ssk1Δ::REP</i> , <i>pVAX-URA3-SSK1</i>      | <i>MATa</i> | 1.24 ±0.06                       | 1.40 ±0.02 |
| <i>skn7+ SKN7</i>                  | <i>ura3</i> <sub>[Δ360]</sub> , <i>skn7Δ::REP</i> , <i>pVAX-URA3-SKN7</i>      | <i>MATa</i> | 1.25 ±0.07                       | 1.44 ±0.11 |

<sup>a</sup> Reference strain from Centraalbureau voor Schimmelcultures (Utrecht, The Netherlands).

<sup>b</sup> Described in (6)

<sup>c</sup> Italicized name of strains corresponds to abbreviated genotypes.

<sup>d</sup> The values are means in h ± standard deviations based on three individual replicates. ND : not determined.

TABLE S3. Oligonucleotides

| Primer | Sequence (5' to 3')              | Use for PCR amplification of                        |
|--------|----------------------------------|-----------------------------------------------------|
| YPDS   | AGTTGCCACTGCGAGCGGCAGAGAACC      | <i>YPD1</i> gene (upstream primer)                  |
| YPDR   | GCTGGTTATCTGGTGCCGCGTTGAACC      | <i>YPD1</i> gene (downstream primer)                |
| SSKS   | TCAGAAGAGAGTCAGACTACCAAGAGGGTC   | <i>SSK1</i> gene (upstream primer)                  |
| SSKR   | TGATGAGCCTTCAGCCGAAGCGCTTGACC    | <i>SSK1</i> gene (downstream primer)                |
| SKNS   | GGGCTAGGCATGGGATTATGCTCGTGCGCC   | <i>SKN7</i> gene (upstream primer)                  |
| SKNR   | CGCCACAGCACAGGTGCTGGTGTATGACCC   | <i>SKN7</i> gene (downstream primer)                |
| BGLUN1 | CTGACAAGATCTCCCGACGTCGCATGCTCC   | GUN sequence (upstream primer, <u>BglII</u> site)   |
| BGLUN2 | CTCAGAAGATCTCCAAGCTATTTAGGTGACAC | GUN sequence (downstream primer, <u>BglII</u> site) |
| XBAUN1 | CTGACATCTAGACCCGACGTCGCATGCTCC   | GUN sequence (upstream primer, <u>XbaI</u> site)    |
| XMAUN2 | CTCAGACCCGGGCCAAGCTATTTAGGTGACAC | GUN sequence (downstream primer, <u>XmaI</u> site)  |

TABLE S4. Pseudohyphal differentiation of *C. lusitanae* strains on various supplemented YCB media.

| Strain                     | YCB     | + sorbitol<br>(1 M) | + NaCl<br>(0.5 M) | + KCl<br>(0.5 M) | + H <sub>2</sub> O <sub>2</sub><br>(1 mM) |
|----------------------------|---------|---------------------|-------------------|------------------|-------------------------------------------|
| WT (6936)                  | 986 ±33 | 407 ±36             | 273 ±22           | 367 ±22          | 400 ±37                                   |
| <i>ssk1::GUN</i>           | 657 ±54 | 113 ±8              | 273 ±16           | 233 ±50          | 500 ±14                                   |
| <i>skn7::GUN</i>           | 933 ±29 | 147 ±57             | 267 ±16           | 347 ±16          | 0                                         |
| <i>skn7::REP ssk1::GUN</i> | 673 ±22 | 113 ±8              | 287 ±16           | 180 ±51          | 0                                         |
| <i>ssk1+ SSK1</i>          | 940 ±37 | 407 ±22             | 273 ±33           | 353 ±8           | 466 ±22                                   |
| <i>skn7+ SKN7</i>          | 933 ±33 | 433 ±8              | 273 ±29           | 327 ±16          | 420 ±14                                   |

The length of pseudohyphae was measured from the edge of the spotted colony. The values are means in  $\mu\text{m} \pm$  standard deviations based on three individual replicates.



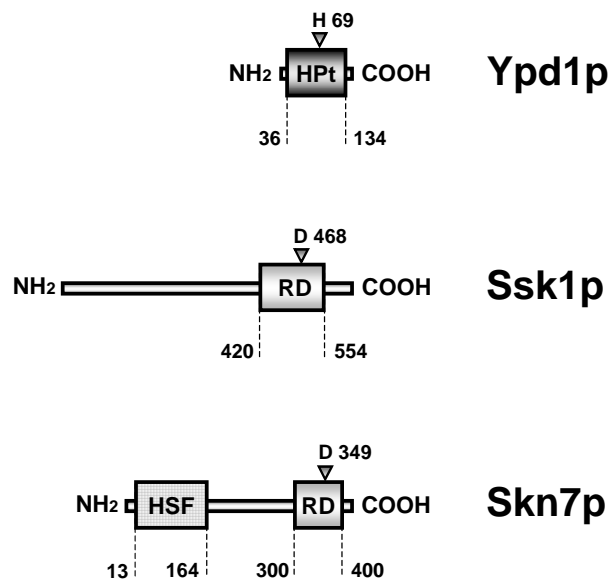

FIG. S1. Structure of Ypd1p, Ssk1p and Skn7p proteins from *C. lusitanae*. HPt : histidine containing phosphotransfer domain ; RD : receiver domain ; HSF : Heat shock factor DNA-binding domain. The positions of phosphorylatable residues histidine (H) or aspartate (D) are indicated.

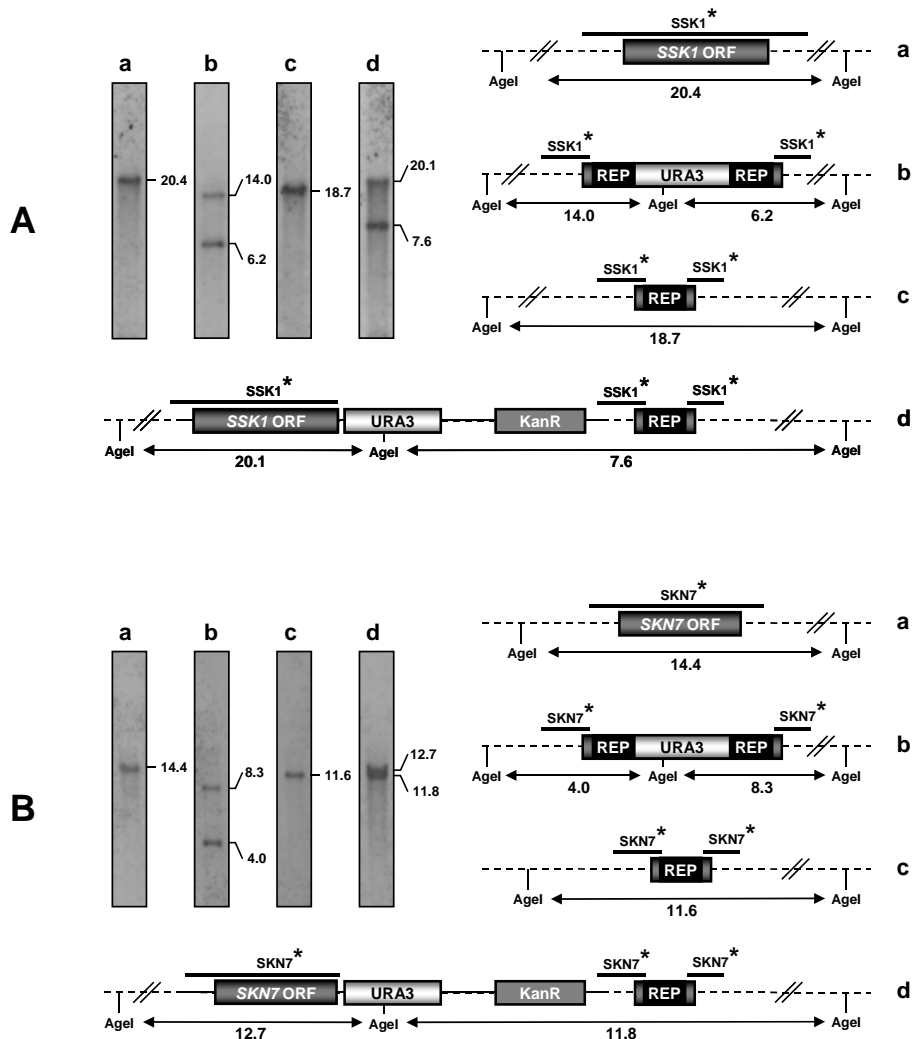

FIG. S2. Southern blot hybridization and schematic representation of resident loci *SSK1* and *SKN7* and of molecular events that occurred in transformants. Signals revealed by the labeled probes (each marked with an asterisk) correspond to those expected from the genomic restriction map. (A) Hybridization pattern with *SSK1* probe of *AgeI*-digested genomic DNA from 6936 *ura3*<sub>[Δ360]</sub> (a), a representative transformant *ssk1*::*GUN* (b), a 5FOA-resistant derivative *ssk1*::*REP* (c) and a reintegrand strain *ssk1*+*SSK1* (d). (B) Hybridization pattern with *SKN7* probe of *AgeI*-digested genomic DNA from 6936 *ura3*<sub>[Δ360]</sub> (a), a representative transformant *skn7*::*GUN* (b), a 5FOA-resistant derivative *skn7*::*REP* (c) and a reintegrand strain *skn7*+*SKN7* (d). DNA fragment sizes are indicated in kilobases.

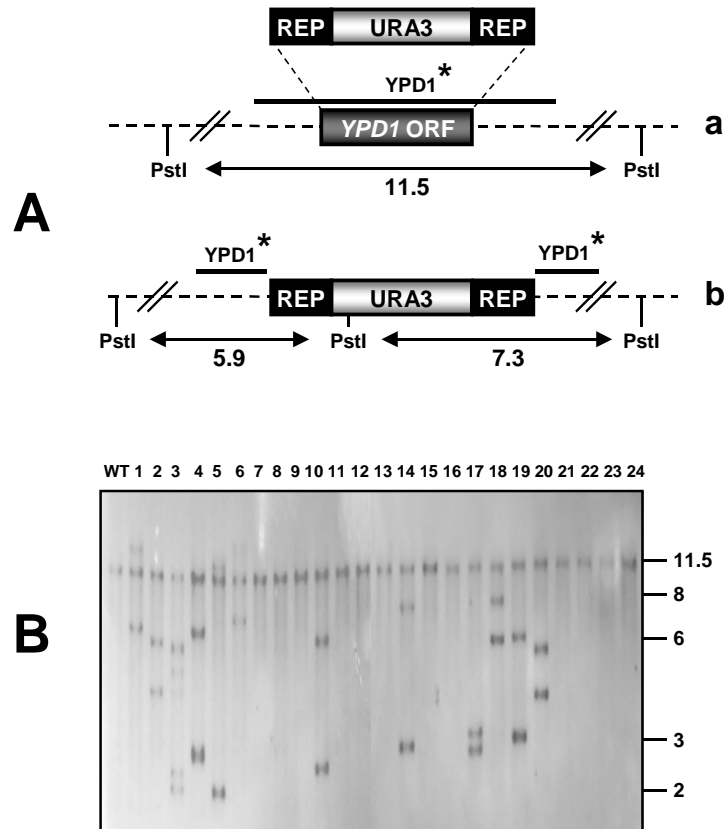

FIG. S3. Southern blot hybridization and schematic representation of resident locus *YPD1*. (A) Expected molecular events from the genomic restriction map. (B) The hybridization pattern is shown with *YPD1* probe of *Pst*I-digested genomic DNA from 6936 *ura3*<sub>[ $\Delta$ 360]</sub> (WT) and 24 *Ura*<sup>+</sup> randomly selected transformants. Transformants derived from ectopic integrations of the disruption cassette (strains 7, 8, 9, 11, 12, 13, 15, 16, 21, 22, 23, 24) or from gene replacement at the *ura3* locus (strains 1, 2, 3, 4, 5, 6, 10, 14, 17, 18, 19, 20). For each transformant, the *YPD1* locus is not affected (11.5 kb DNA fragment). DNA fragment sizes are indicated in kilobases.
